# Supplementary material
Source: publisher figshare collection journal article supplement (https://plos.figshare.com/articles/dataset/_/147032)

A

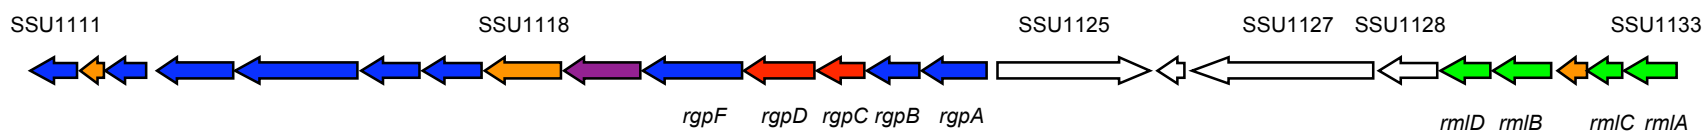

-  synthesis of dTDP-L-rhamnose
-  glycosyltransferase
-  flippase
-  transporter
-  unknown function

B

*S. suis* P1/7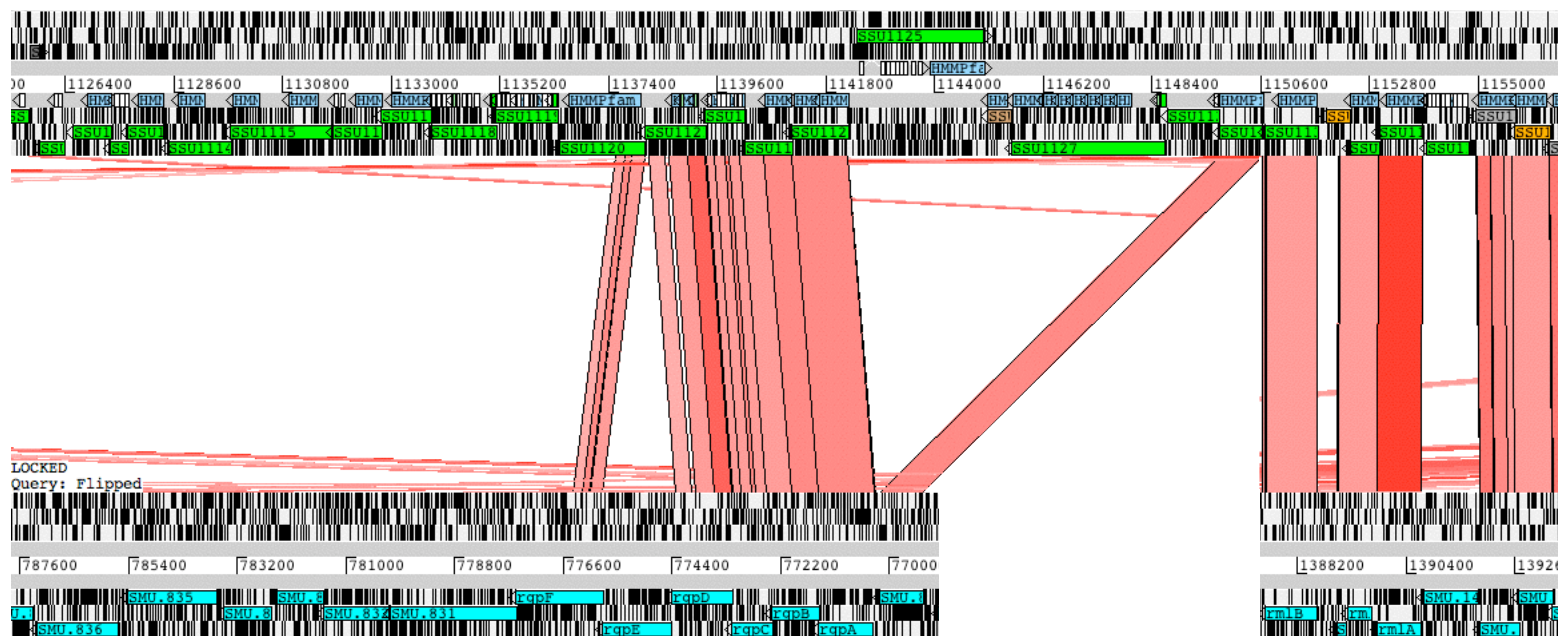

Supplement: Supplementary file [file 1]
